# Supplementary material for: Quantifying noxious-evoked baseline sensitivity in neonates to optimise analgesic trials
Source: eLife. 2021 Apr 13;10:e65266. doi: 10.7554/eLife.65266 (PMC8087440; doi:10.7554/eLife.65266)
Supplement: Figure 2—source data 1. [file elife-65266-fig2-data1.xlsx]

## Sheet: Figure 2A
Figure 2A - scatter plot
x	y
0.272671	0.400811
0.443474	0.816329
0.616561	2.3353
0.148434	-0.0733462
0.501115	1.93363
0.590119	1.42936
0.290062	0.763459
0.399825	1.38368
0.394939	0.54774
