# Supplementary material for: Quantifying noxious-evoked baseline sensitivity in neonates to optimise analgesic trials
Source: eLife. 2021 Apr 13;10:e65266. doi: 10.7554/eLife.65266 (PMC8087440; doi:10.7554/eLife.65266)
Supplement: Figure 3—source data 1. [file elife-65266-fig3-data1.xlsx]

## Sheet: Figure 3
Figure 3A - scatter plot			Figure 3B			Figure 3C - scatter plot
x	y		Control Group	Intervention Group		x	y
0.776167	1.2762		1.2762	0.710643		0.435224	0.710643
0.260409	0.802101		0.802101	-0.0654598		-0.00331283	-0.0654598
0.486259	0.802349		0.802349	1.48467		0.29044	1.48467
0.20038	0.913276		0.913276	0.707237		0.097736	0.707237
0.199327	0.448738		0.448738	0.200055		0.224242	0.200055
0.349741	1.54395		1.54395	1.10357		0.372061	1.10357
0.164427	0.301554		0.301554	0.0326175		0.576205	0.0326175
0.275906	0.889736		0.889736	0.711749		0.439825	0.711749
0.237769	0.731762		0.731762	0.524342		0.406949	0.524342
0.081598	0.622562		0.622562	0.878764		0.487826	0.878764
0.160069	0.458786		0.458786	0.573601		0.205188	0.573601
0.245569	1.06246		1.06246	0.522566		0.166794	0.522566
0.0685161	0.294866		0.294866	0.256188		0.247415	0.256188
0.249125	0.84755		0.84755	0.408994		0.239243	0.408994
0.821662	2.84569		2.84569	0.483222		0.149809	0.483222
				0.379651		0.322921	0.379651
