# Supplementary material for: Quantifying noxious-evoked baseline sensitivity in neonates to optimise analgesic trials
Source: eLife. 2021 Apr 13;10:e65266. doi: 10.7554/eLife.65266 (PMC8087440; doi:10.7554/eLife.65266)
Supplement: Figure 4—source data 1. [file elife-65266-fig4-data1.xlsx]

## Sheet: Figure 4
Figure 4A - scatter plot			Figure 4B			Figure 4C - scatter plot
x	y		Control Group	Intervention Group		x	y
0.838616	0.946897		0.946897	87.2494		2.25965	87.2494
5.25986	37.3385		37.3385	19.1571		8.4646	19.1571
45.4034	61.2207		61.2207	34.318		34.983	34.318
41.4831	57.3933		57.3933	36.9535		36.8566	36.9535
19.3378	37.4716		37.4716	11.9713		28.8612	11.9713
5.06912	24.5827		24.5827	62.9784		36.7995	62.9784
1.92243	39.5874		39.5874	33.0373		59.5301	33.0373
25.4361	50.8136		50.8136	16.7931		35.8776	16.7931
12.7099	38.9317		38.9317	66.237		13.6068	66.237
2.00016	13.7716		13.7716	52.0661		51.6726	52.0661
15.0772	20.1642		20.1642	63.5157		27.951	63.5157
19.6153	8.62268		8.62268	96.7897		28.3624	96.7897
1.68546	30.2206		30.2206	92.6796		8.67518	92.6796
6.2968	36.428		36.428	38.1026		6.72225	38.1026
5.73142	41.3106		41.3106	32.4559		28.0723	32.4559
9.92322	25.094		25.094
9.06201	36.7217		36.7217
22.2592	79.1474		79.1474
