# Supplementary material for: Quantifying noxious-evoked baseline sensitivity in neonates to optimise analgesic trials
Source: eLife. 2021 Apr 13;10:e65266. doi: 10.7554/eLife.65266 (PMC8087440; doi:10.7554/eLife.65266)
Supplement: Figure 5—source data 1. [file elife-65266-fig5-data1.xlsx]

## Sheet: Figure 5
Figure 5B			Figure 5C			Figure 5D
Control Group	Intervention Group		x	y		x	y
-0.0718209	0.466962		0.765088	0.459614		0.765088	0.233186
0.874719	0.868759		0.513648	0.666371		0.513648	0.244572
1.2561	0.0431207		0.342028	0.269633		0.342028	0.381941
0.308795	0.534465		0.199481	0.335746		0.199481	0.177848
0.810556	0.798277		0.0999778	0.43		0.0999778	0.275137
1.67131	-0.0813939		0.235133	0.36868		0.235133	0.563718
1.73539	0.266659		0.199758	0.310078		0.199758	0.215486
0.957761	0.623633		0.0982932	0.341468		0.0982932	0.0529469
2.14379	0.901039		0.0958732	0.128641		0.0958732	0.274122
0.553287	0.304916
0.197672	0.319212
0.361482	0.196954
0.870124	0.151009
0.0117374	1.22278
0.494703	0.170318
0.817919	0.128098
0.133444	0.516605
1.63126	0.447224
0.048904	0.224269
1.63579	0.433454
0.891237	0.36868
1.28009	0.122482
1.14574	0.497673
1.98642	0.62617
0.517694	0.214243
1.0341	0.18399
0.914443	0.128641
0.754129
0.628423
1.31114
0.88045
0.482774
