# Supplementary figures and images for: Quantifying noxious-evoked baseline sensitivity in neonates to optimise analgesic trials
Source: eLife journal article supplement (doi:10.7554/elife.65266), 2021-04-13

**A**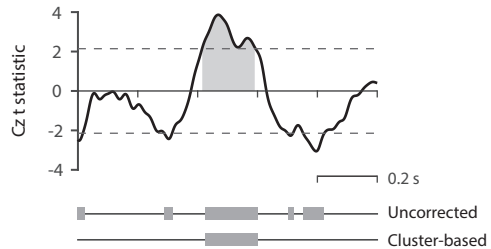**B**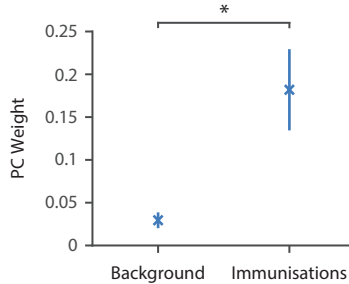**C**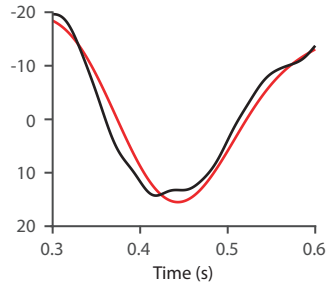

Supplement: supp [file elife-65266-supp-v1.zip]

## Control Group

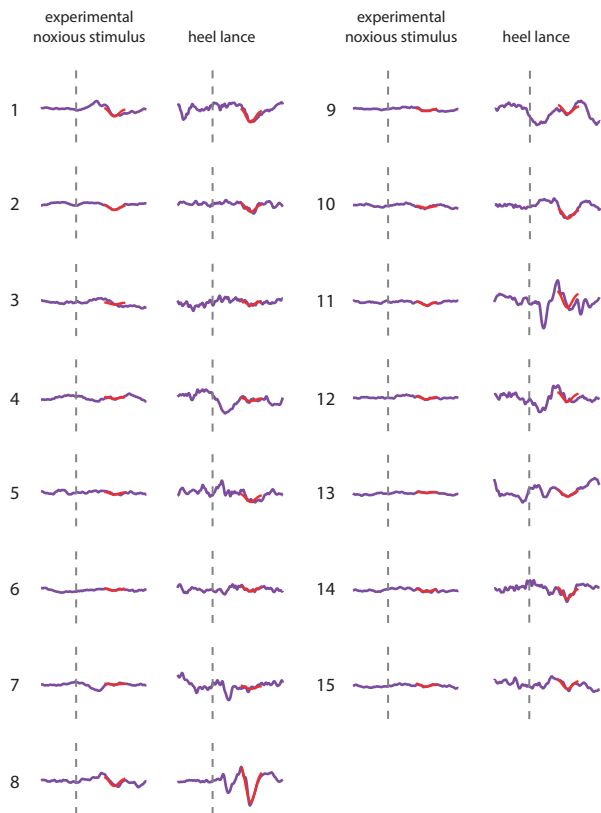

## Intervention Group

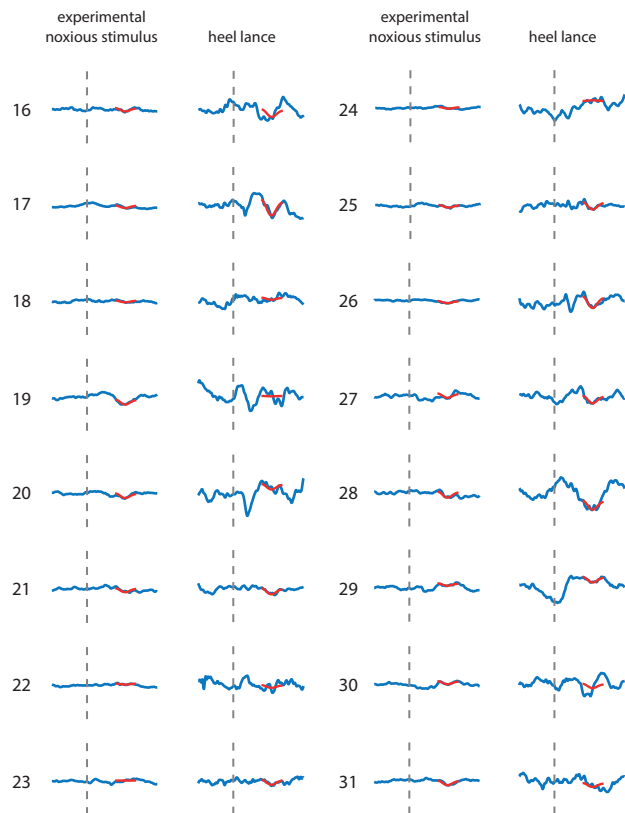

50  $\mu$ V  
500 ms

Supplement: supp [file elife-65266-supp-v1.zip]

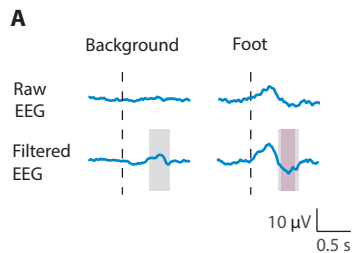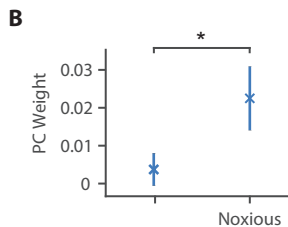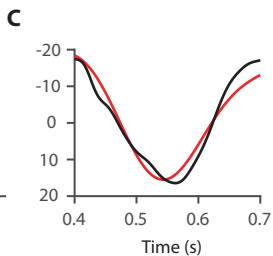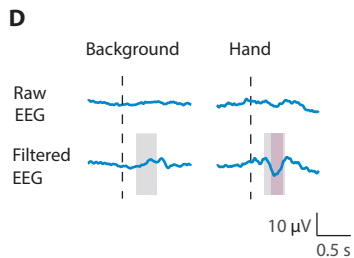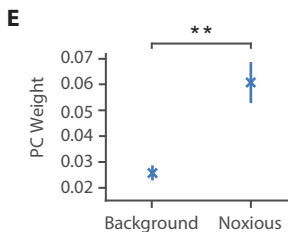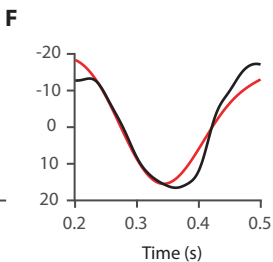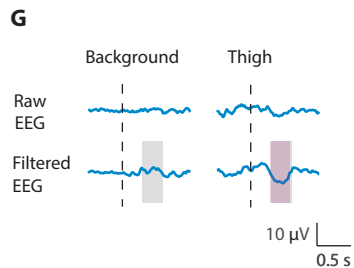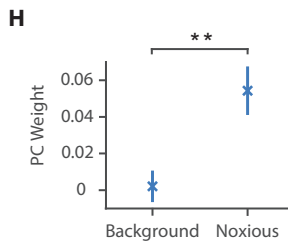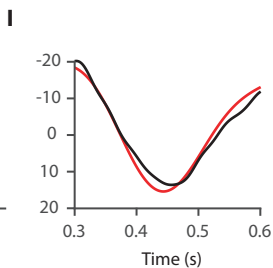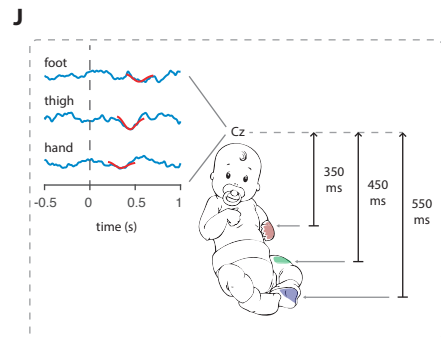

Supplement: supp [file elife-65266-supp-v1.zip]

Control Group

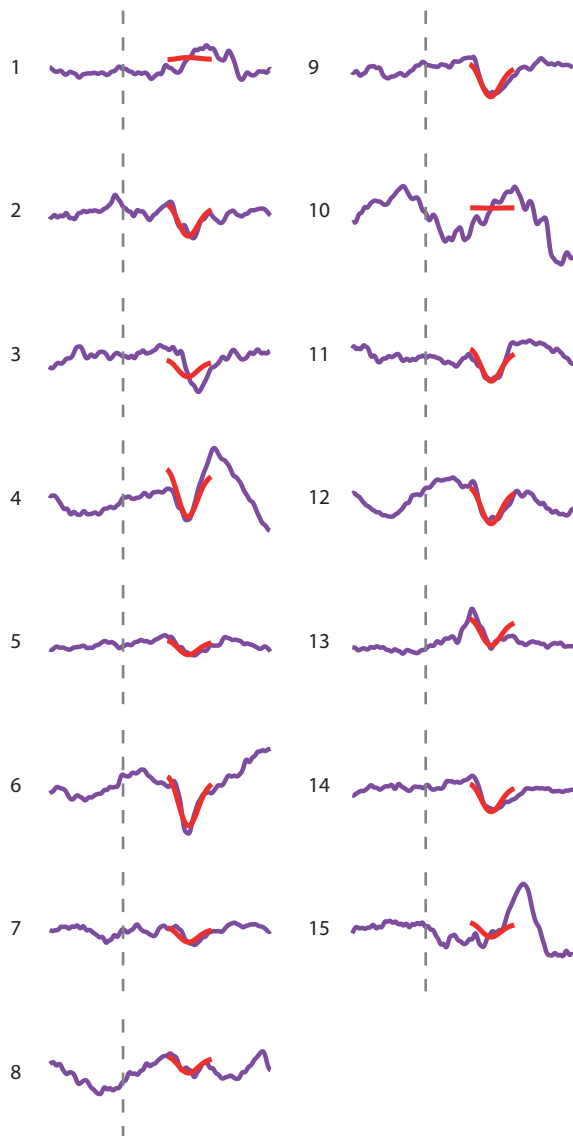

Intervention Group

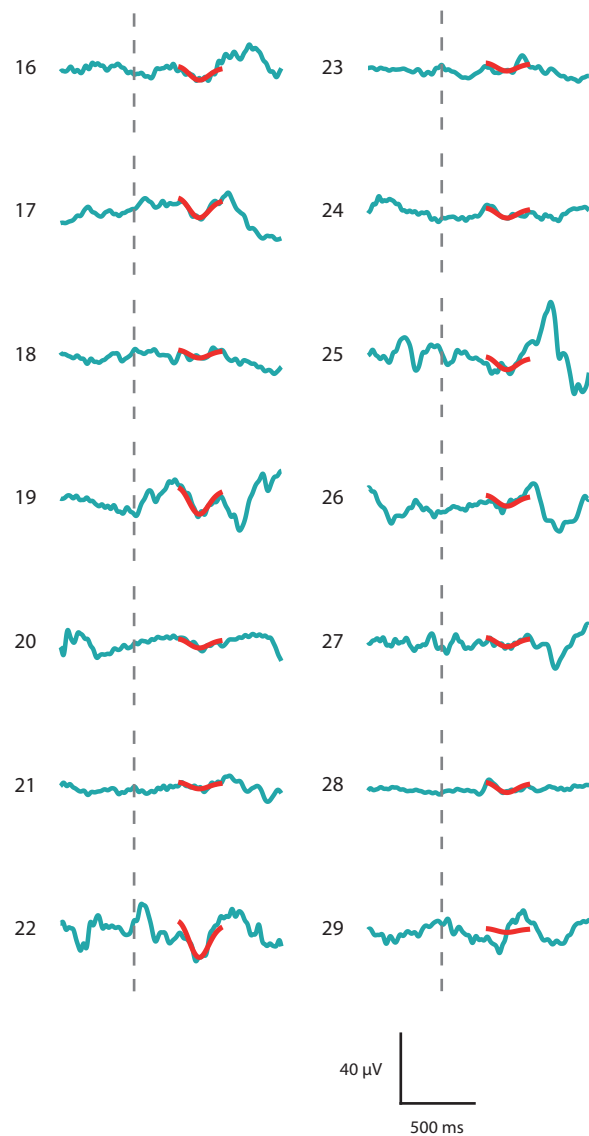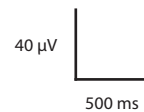

Supplement: supp [file elife-65266-supp-v1.zip]
